# Supplementary material for: Molecular Characterization of an Intact p53 Pathway Subtype in High-Grade Serous Ovarian Cancer
Source: PubMed Central journal article supplement (PMC4252108; doi:10.1371/journal.pone.0114491), 2014-12-02
Supplement: pone.0114491.s001.pdf [file pone.0114491.s001.pdf]

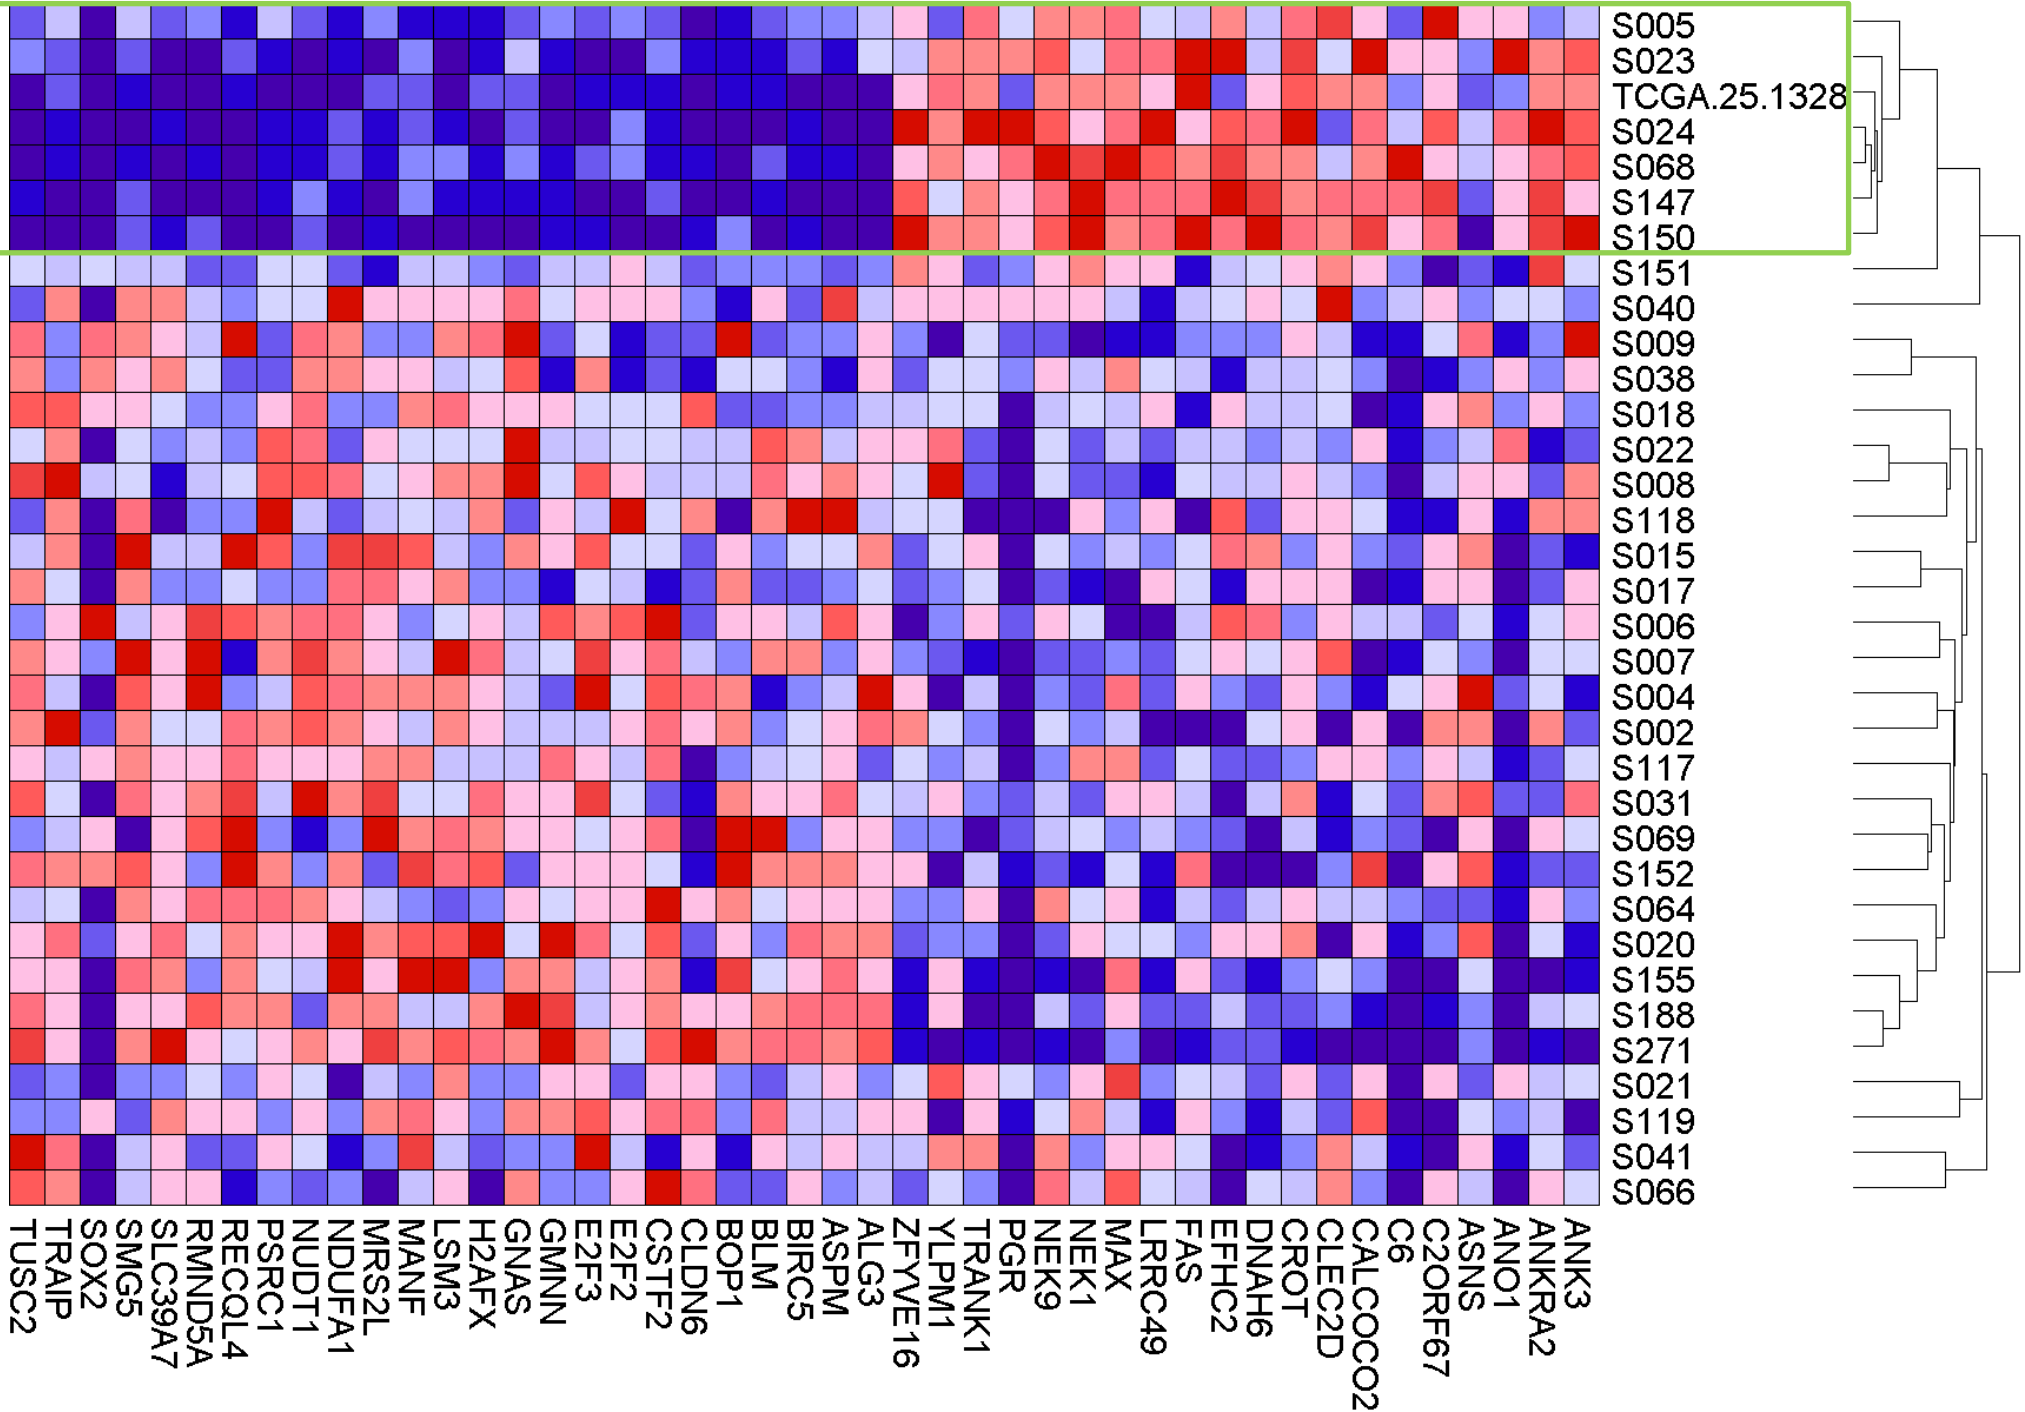

|              |  |  |  |
|--------------|--|--|--|
| TCGA-25-1328 |  |  |  |
| TCGA-25-2408 |  |  |  |
| TCGA-24-1565 |  |  |  |
| TCGA-24-2038 |  |  |  |
| TCGA-13-0755 |  |  |  |
| TCGA-25-2042 |  |  |  |
| TCGA-61-2095 |  |  |  |
| TCGA-09-2056 |  |  |  |
| TCGA-10-0933 |  |  |  |
| TCGA-13-1408 |  |  |  |
| TCGA-13-1477 |  |  |  |
| TCGA-25-1316 |  |  |  |
| TCGA-13-0727 |  |  |  |
| TCGA-24-1544 |  |  |  |
| TCGA-24-2293 |  |  |  |

TP53\_Del  
MDM2\_Amp  
p53\_Target\_mut
