# Supplementary material for: Molecular Characterization of an Intact p53 Pathway Subtype in High-Grade Serous Ovarian Cancer
Source: PubMed Central journal article supplement (PMC4252108; doi:10.1371/journal.pone.0114491), 2014-12-02

Overall survival

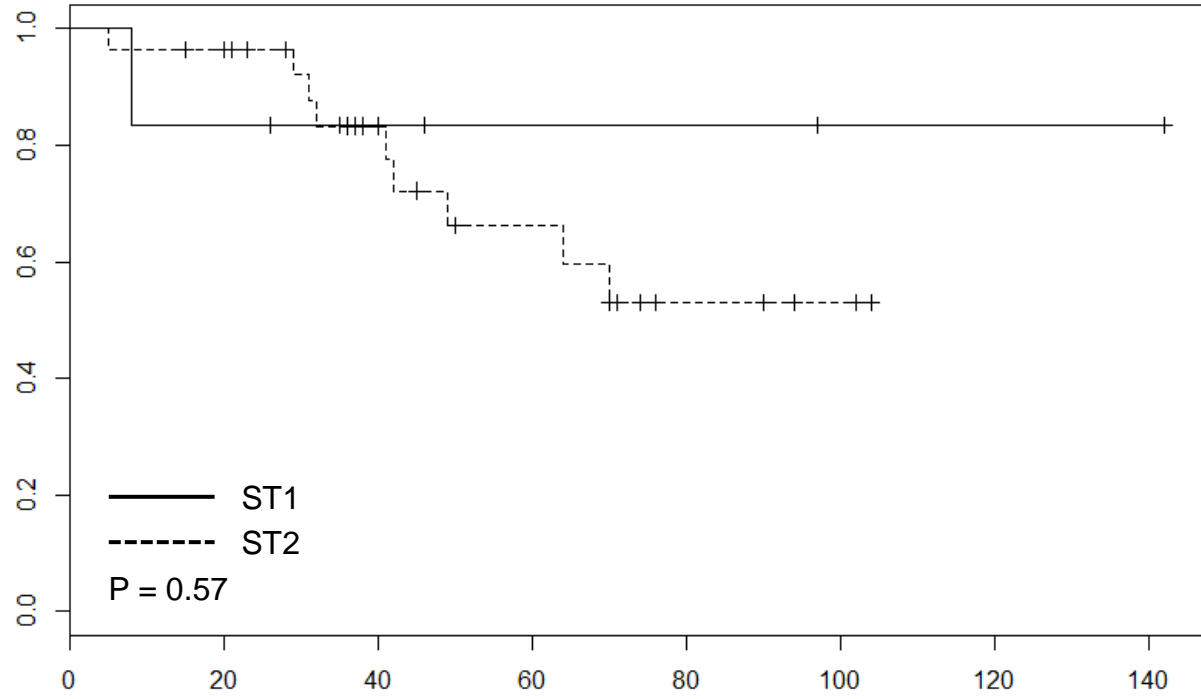

Progression-free survival

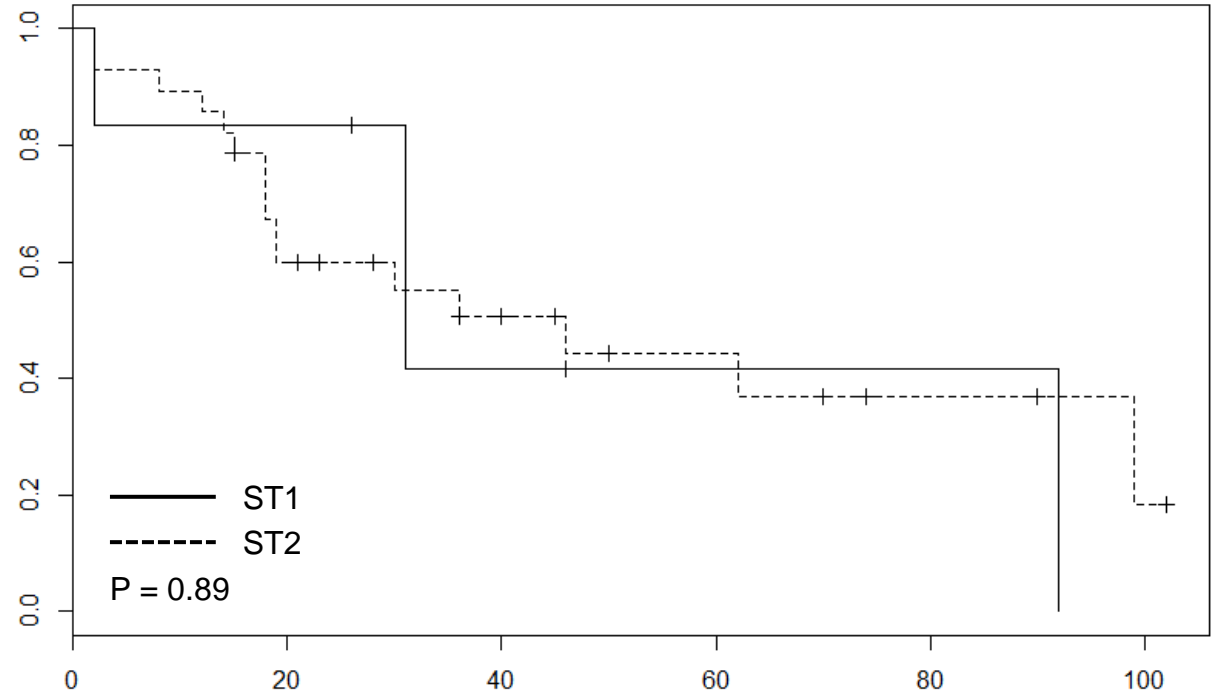

Supplement: pone.0114491.s002.pdf [file pone.0114491.s002.pdf]
