# Supplementary material for: Molecular Characterization of an Intact p53 Pathway Subtype in High-Grade Serous Ovarian Cancer
Source: PubMed Central journal article supplement (PMC4252108; doi:10.1371/journal.pone.0114491), 2014-12-02
Supplement: pone.0114491.s007.pdf [file pone.0114491.s007.pdf]

| CNVR (hg18)              | Cytoband        | Fisher's exact test | Cases Del | Control Del | Gene                                                         |
|--------------------------|-----------------|---------------------|-----------|-------------|--------------------------------------------------------------|
| chr4:103571694-103707311 | 4q24            | 5.E-08              | 18        | 0           | <i>NFKB1</i>                                                 |
| chr6:130106363-130740491 | 6q22.33,6q23.1  | 4.E-07              | 16        | 0           | <i>ARHGAP18,C6orf191,L3MBTL3,SAMD3,TMEM200A</i>              |
| chr17:29925858-30230919  | 17q12           | 6.E-07              | 16        | 0           | <i>C17orf102,TMEM132E</i>                                    |
| chr5:71393645-72053142   | 5q13.2          | 6.E-07              | 16        | 0           | <i>MAP1B,MRPS27,PTCD2,ZNF366</i>                             |
| chr5:66877750-67197527   | 5q13.1          | 6.E-07              | 17        | 0           | <i>BC042046</i>                                              |
| chr22:34881104-35141765  | 22q12.3         | 8.E-07              | 15        | 0           | <i>APOL1,APOL2,APOL3,APOL4,APOLIV,AX747758,AX748195,MYH9</i> |
| chr18:53265145-53392188  | 18q21.31        | 3.E-06              | 14        | 0           | <i>FECH,ONECUT2</i>                                          |
| chr15:74189059-74665417  | 15q24.2,15q24.3 | 2.E-05              | 12        | 0           | <i>C15orf27,ETFA,ISL2,KIAA1454,SCAPER</i>                    |
| chr1:25149393-25310537   | 1p36.11         | 5.E-05              | 11        | 0           | <i>AML2,RUNX3</i>                                            |
