# Supplementary material for: Molecular Characterization of an Intact p53 Pathway Subtype in High-Grade Serous Ovarian Cancer
Source: PubMed Central journal article supplement (PMC4252108; doi:10.1371/journal.pone.0114491), 2014-12-02
Supplement: pone.0114491.s015.pdf [file pone.0114491.s015.pdf]

| Gene          | Probe        | Kolmogorov-Smirnov test (ST1) | Kolmogorov-Smirnov test (ST2) | F test | t-test (var.equal=T) | t-test (var.equal=F) |
|---------------|--------------|-------------------------------|-------------------------------|--------|----------------------|----------------------|
| <i>NEK1</i>   | A_23_P124427 | 0.87                          | 0.55                          | 0.19   | 0.0000019            | -                    |
| <i>NEK9</i>   | A_23_P3131   | 0.78                          | 0.82                          | 0.037  | -                    | 0.010                |
| <i>ASPM</i>   | A_23_P52017  | 0.84                          | 0.67                          | 0.020  | -                    | 0.0000015            |
| <i>ASPM</i>   | A_24_P911179 | 0.68                          | 0.55                          | 0.0017 | -                    | 0.00000019           |
| <i>BIRC5</i>  | A_32_P188921 | 0.87                          | 0.17                          | 0.0043 | -                    | 0.0000098            |
| <i>CDCA2</i>  | A_23_P385861 | 0.67                          | 0.35                          | 0.070  | 0.0035               | -                    |
| <i>SKA3</i>   | A_23_P340909 | 0.53                          | 0.74                          | 0.073  | 0.000078             | -                    |
|               |              |                               |                               |        |                      |                      |
| Gene          | Probe        | Kolmogorov-Smirnov test (ST1) | Kolmogorov-Smirnov test (ST2) | F test | t-test (var.equal=T) | t-test (var.equal=F) |
| <i>BLM</i>    | A_23_P88630  | 0.99                          | 0.56                          | 0.0027 | -                    | 0.0000037            |
| <i>PIF1</i>   | A_23_P323749 | 0.72                          | 0.20                          | 0.011  | -                    | 0.000017             |
| <i>PIF1</i>   | A_23_P416468 | 0.29                          | 0.29                          | 0.023  | -                    | 0.0000045            |
| <i>RECQL4</i> | A_23_P71558  | 0.69                          | 0.32                          | 0.0020 | -                    | 0.0000043            |
